# Supplementary material for: Visualization and tracking of tumour extracellular vesicle delivery and RNA translation using multiplexed reporters
Source: Springer Nature journal article supplement (doi:10.1038/ncomms8029), 2015-05-13
Supplement: 41467_2015_BFncomms8029_MOESM600_ESM.pdf [file 41467_2015_BFncomms8029_MOESM600_ESM.pdf]

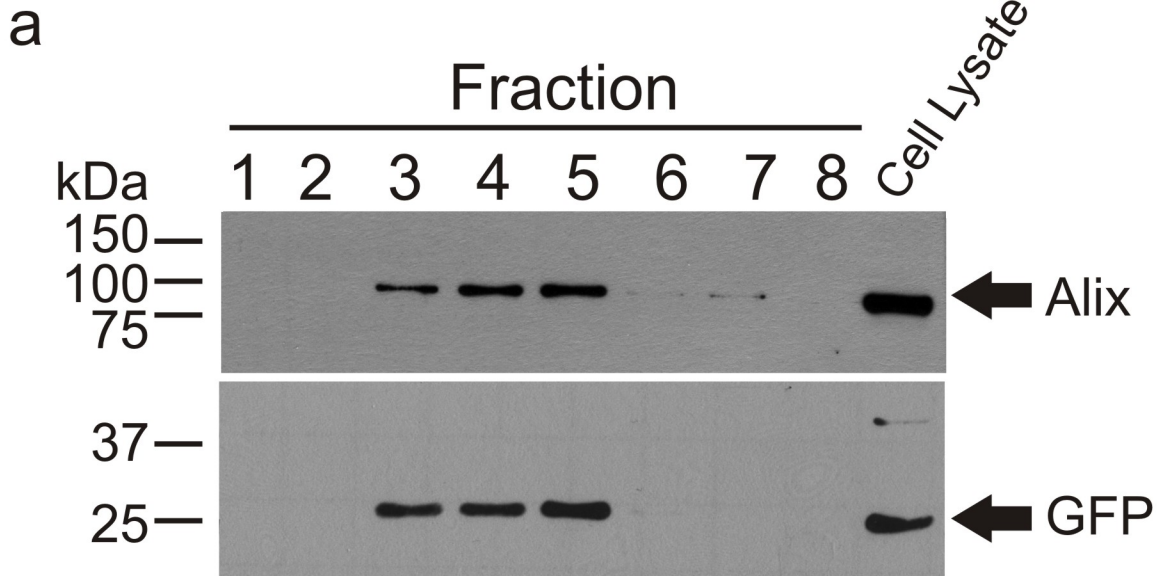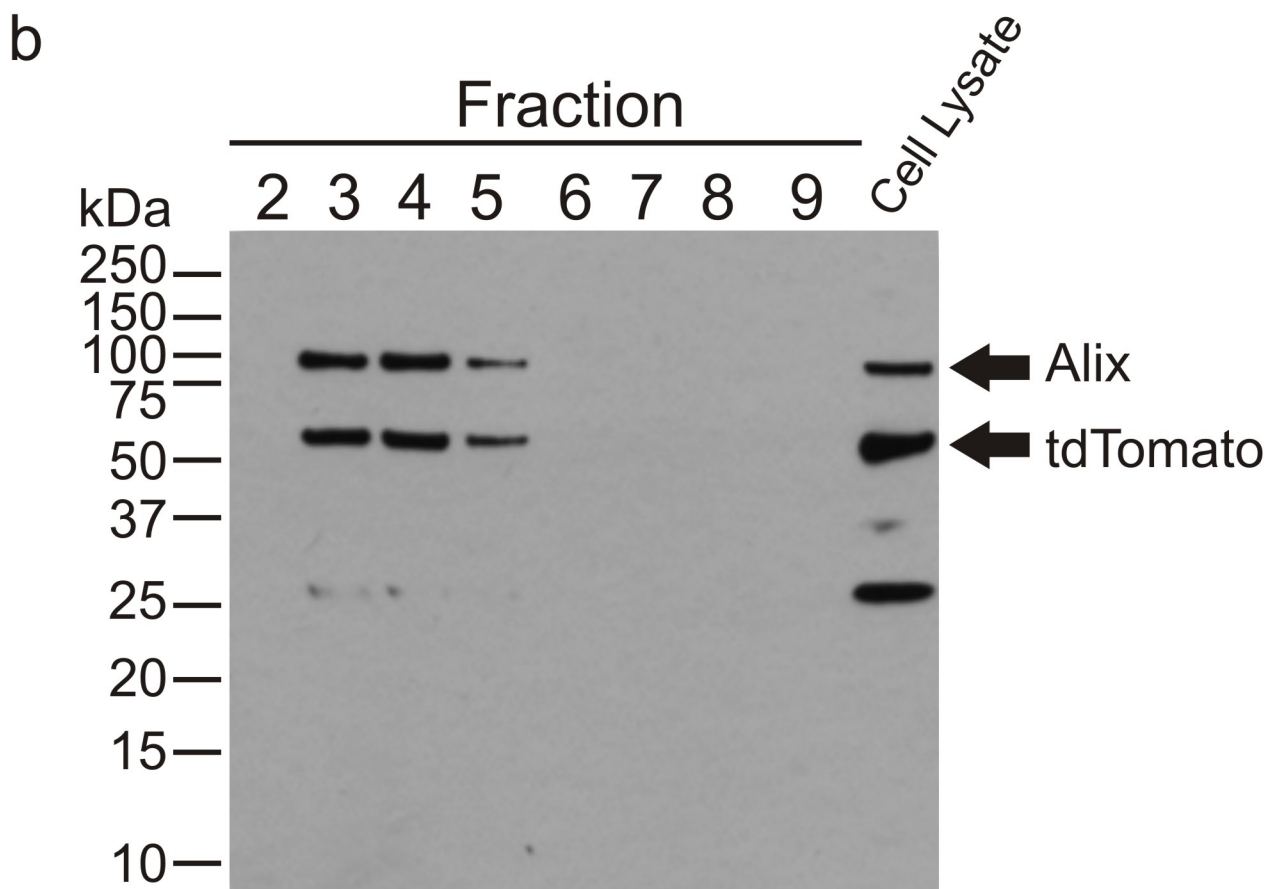

**Supplementary Figure 1. Western blots of Fig. 1c, d.** (a, b) Western blot analysis of pelleted proteins from fractions collected following sucrose gradient centrifugation of PalmGFP- (a) and Palmtomato-labeled EVs (b). Cells lysate of 293-PalmGFP or -Palmtomato were used as a positive control. Immunoblotting with anti-tdTomato antibody revealed a band at 25 kDa predominantly in the cell lysate but not in the EV-containing fractions, indicating it may be cleaved monomers of tdTomato.

anti-rabbit  
protein A gold (5 nm)

PalmGFP-EV

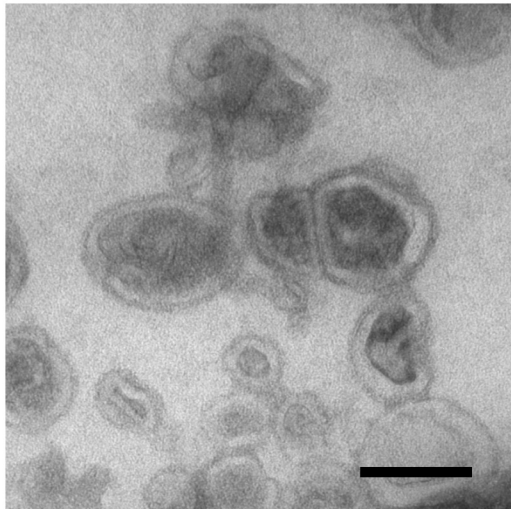

anti-mouse  
protein A gold (10 nm)

PalmtdTomato-EV

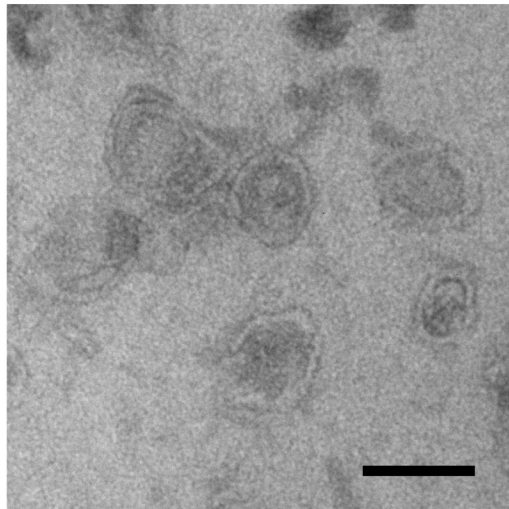

**Supplementary Figure 2. Secondary antibody control immunolabeling of PalmGFP- and PalmtdTomato-EVs.** PalmGFP- and PalmtdTomato-EVs were immunolabeled with anti-mouse protein A gold (5 nm) and anti-rabbit protein A gold (10 nm) antibodies, respectively. TEM shows no non-specific binding of the secondary antibodies to PalmGFP (left) and PalmtdTomato-EVs (right). Bar, 100 nm.

a

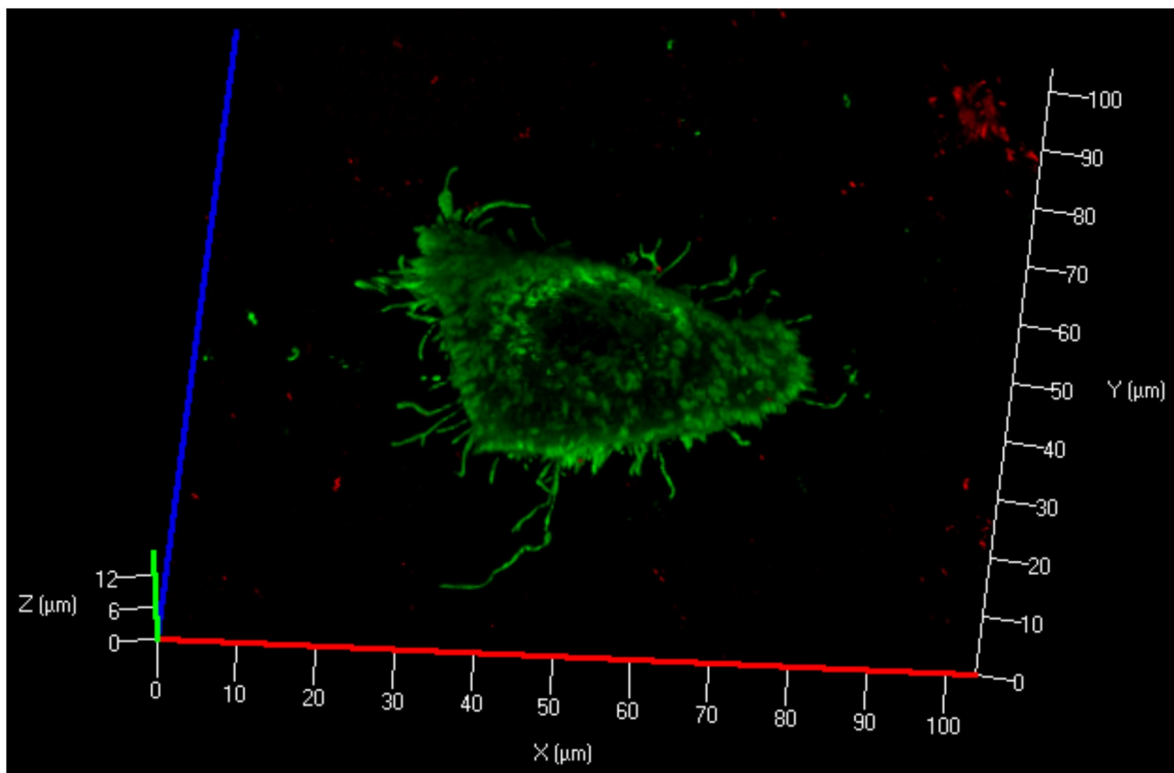

b

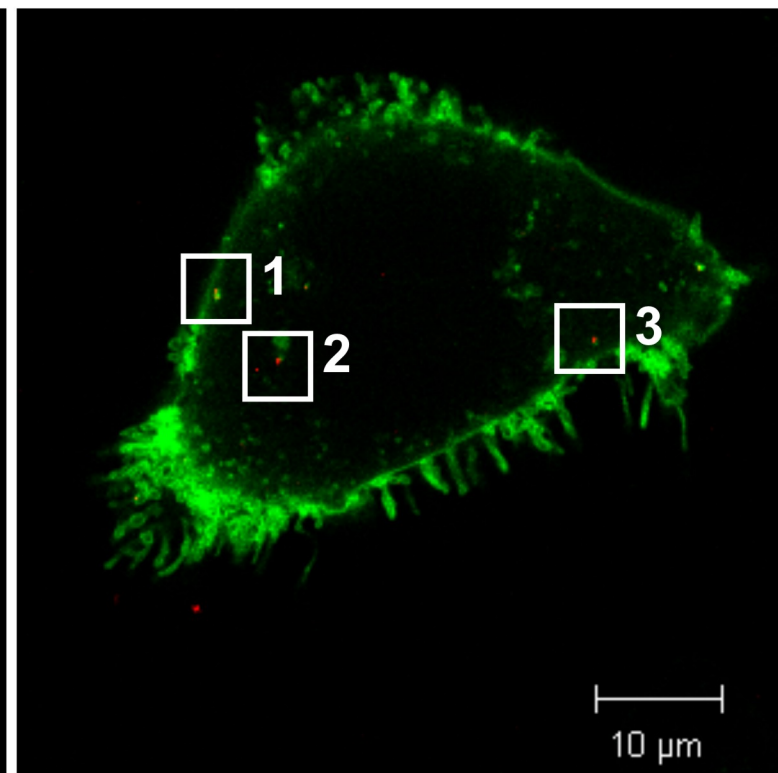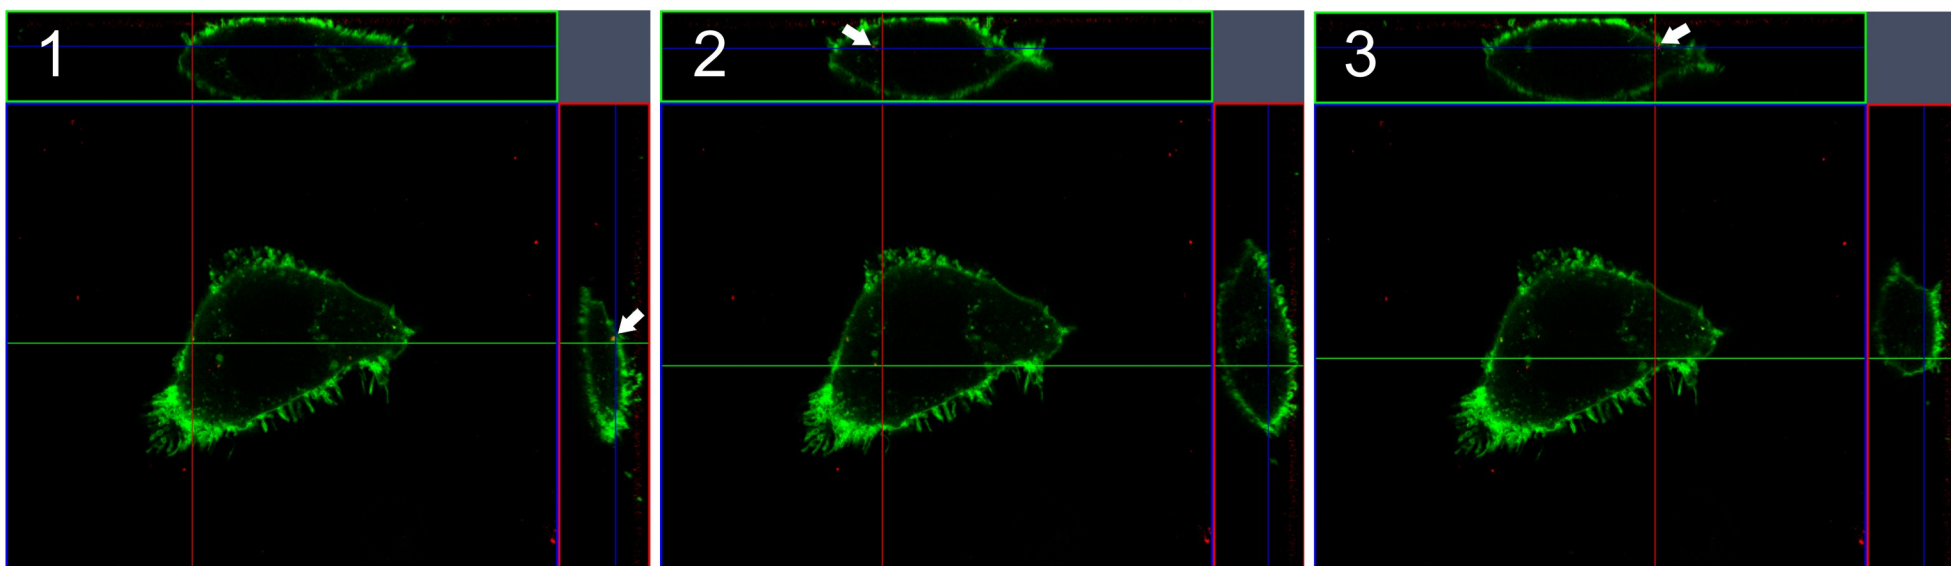

**Supplementary Figure 3. EV docking and internalization by recipient cells.** (a) 3D reconstruction of Z-stack images showing 293T-PalmGFP cells exposed to 293T-PalmtmTomato<sup>+</sup> EVs for 1.75 h. (b) Single Z-plane confocal image and orthogonal projections from Z-stack images (subpanel 1-3) demonstrating EV docking on the plasma membrane (arrow; subpanel 1 and 3) and uptake by the recipient cell (arrow, subpanel 3). Bar, 10  $\mu$ m.

# PalmtTomato-EV Uptake

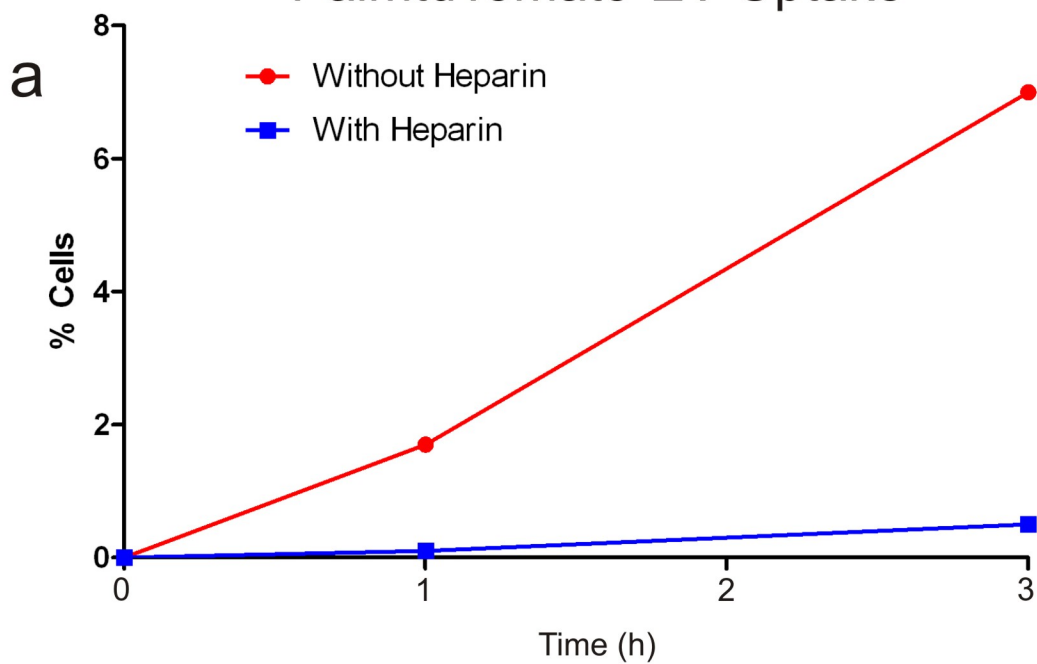

**b**

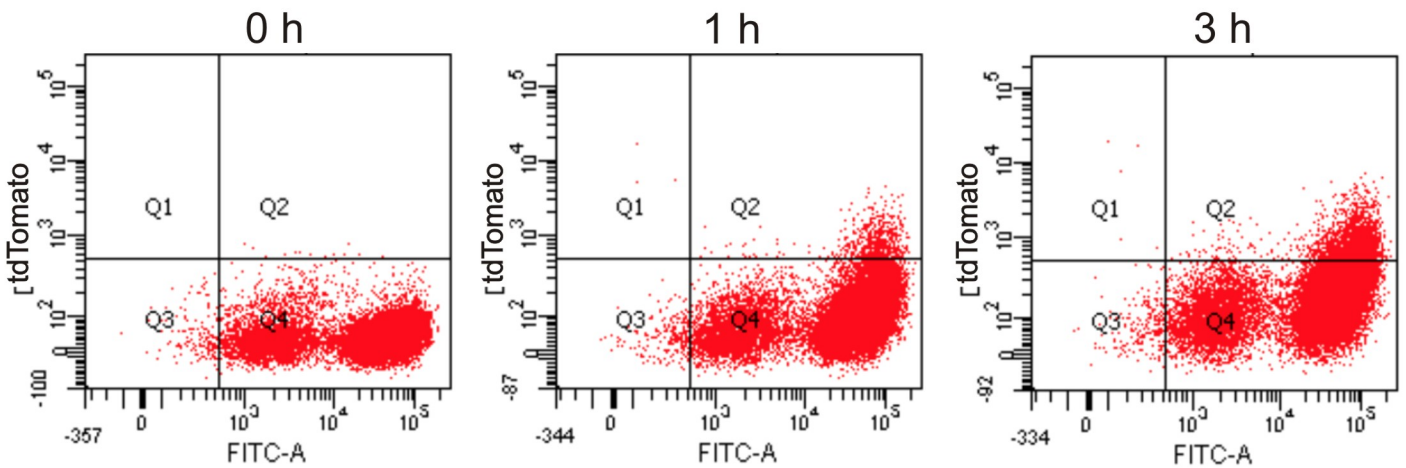

**c**

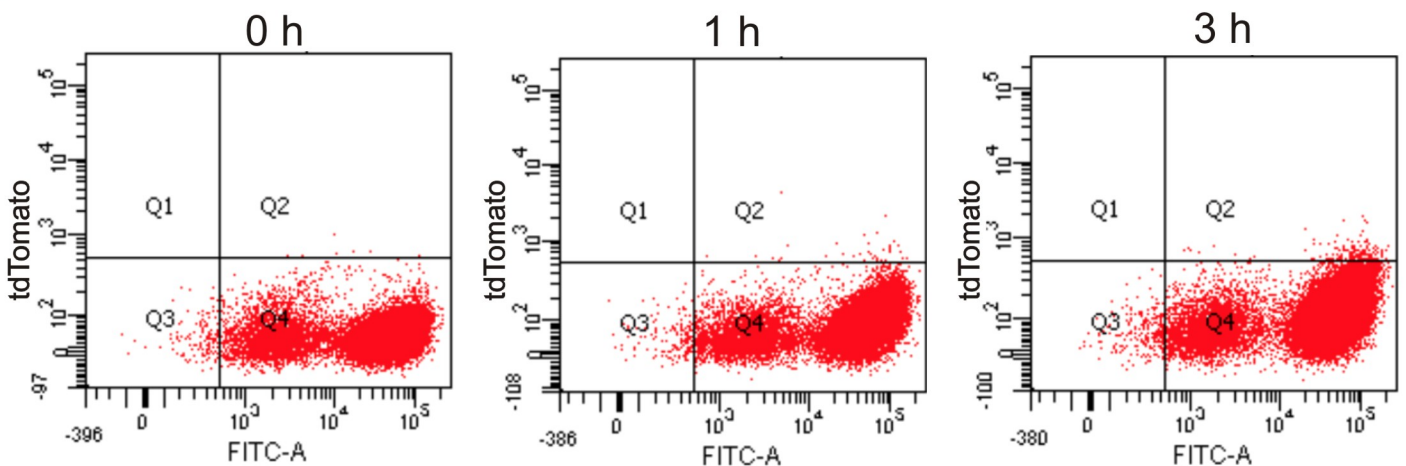

**Supplementary Figure 4. Heparin-mediated inhibition of 293T-PalmtTomato<sup>+</sup> EV uptake by Gli36 cells.** (a) Gli36-PalmGFP cells were treated with 293T-PalmtTomato<sup>+</sup> EVs and centrifuged at 4 °C for 1.5 h followed by a wash with PBS and replaced with EV-depleted media in the presence or absence of heparin (200 µg/mL). Cells were then collected at 0, 1 and 3 h to assess EV uptake by FACS analysis. (b, c) FACS analyses of Gli36-PalmGFP cells in the absence (b) or presence (c) of heparin.

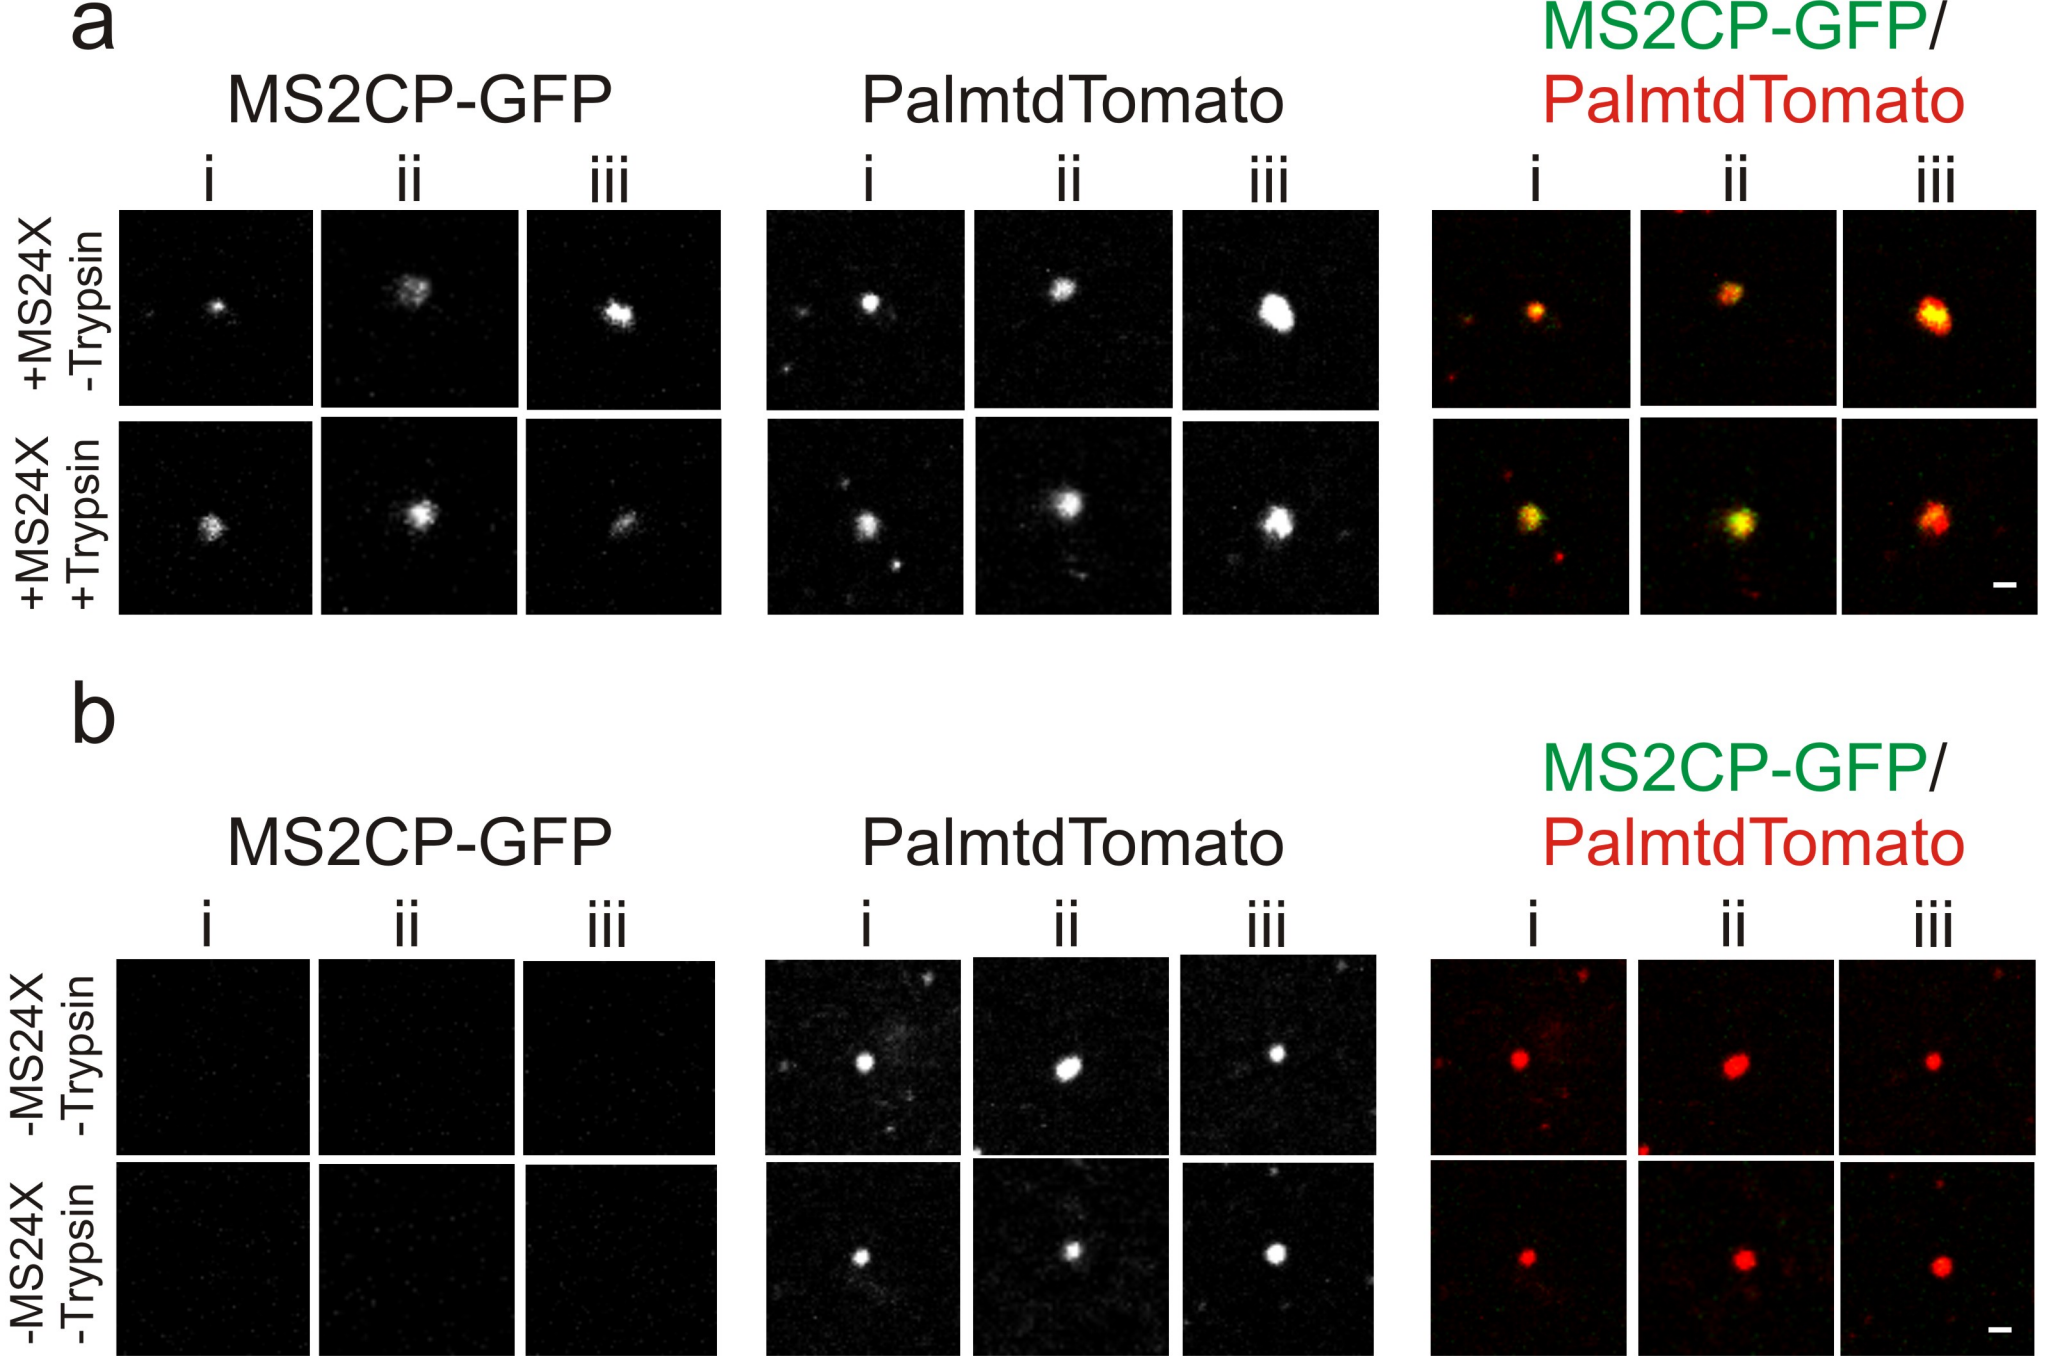

**Supplementary Figure 5. Trypsin does not remove MS2CP-GFP from EVs.** (a, b) EVs (subpanel i-iii) isolated from Gli36 cells co-expressing MS2CP-GFP and Palmtomato-MS24X (a) or Palmtomato (b) were imaged in the presence or absence of trypsin. Bar, 1  $\mu$ m. MS2CP-GFP signals were detected with Palmtomato<sup>+</sup> EV in the presence and absence of trypsin when the MS24X tag is present. No appreciable MS2CP-GFP signal was detected with Palmtomato<sup>+</sup> when the MS24X tag is absent in the EV donor cells.

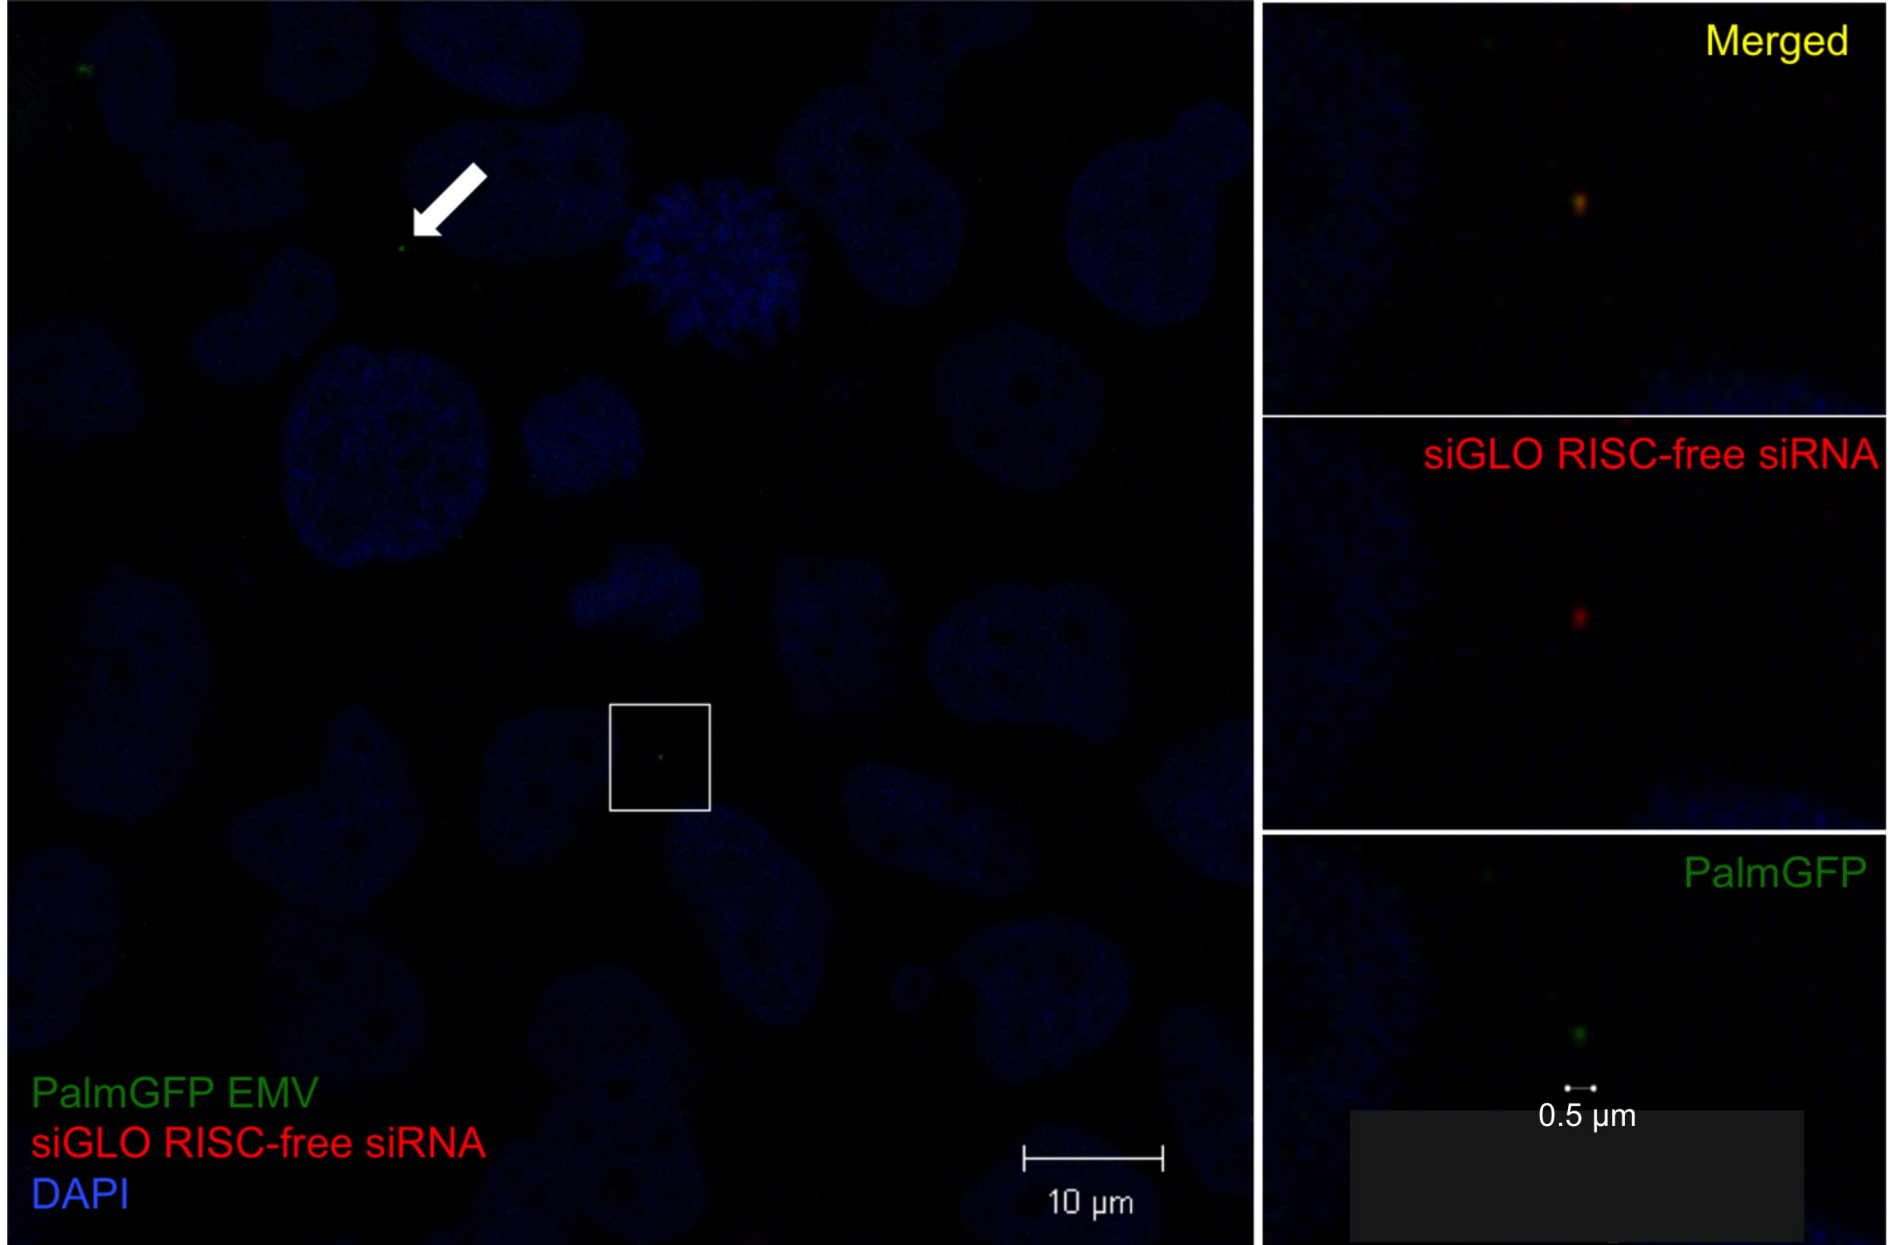

**Supplementary Figure 6. Visualizing and tracking EV-delivered siRNAs.** Gli36 glioma cells were seeded in the bottom dish of a transwell setup to serve as EV recipient cells. As EV donors, 293T-PalmGFP cells were transfected with siGLO RISC-free siRNA conjugated with DY-547, seeded into the upper transwell chamber (connected to the lower chamber through 1 µm pores) and allowed to incubate for 24 h. Gli36 cells were then fixed, stained with DAPI to reveal nuclei, and imaged with confocal microscopy. *Square box*, co-localization between PalmGFP<sup>+</sup> EVs and siGLO RISC-free siRNA in recipient cells. *Arrow*, imaging negative control for DY-547 illustrating only PalmGFP<sup>+</sup> EV signals. *Right panels*, magnified images showing PalmGFP<sup>+</sup> EV associated siRNAs.

**a**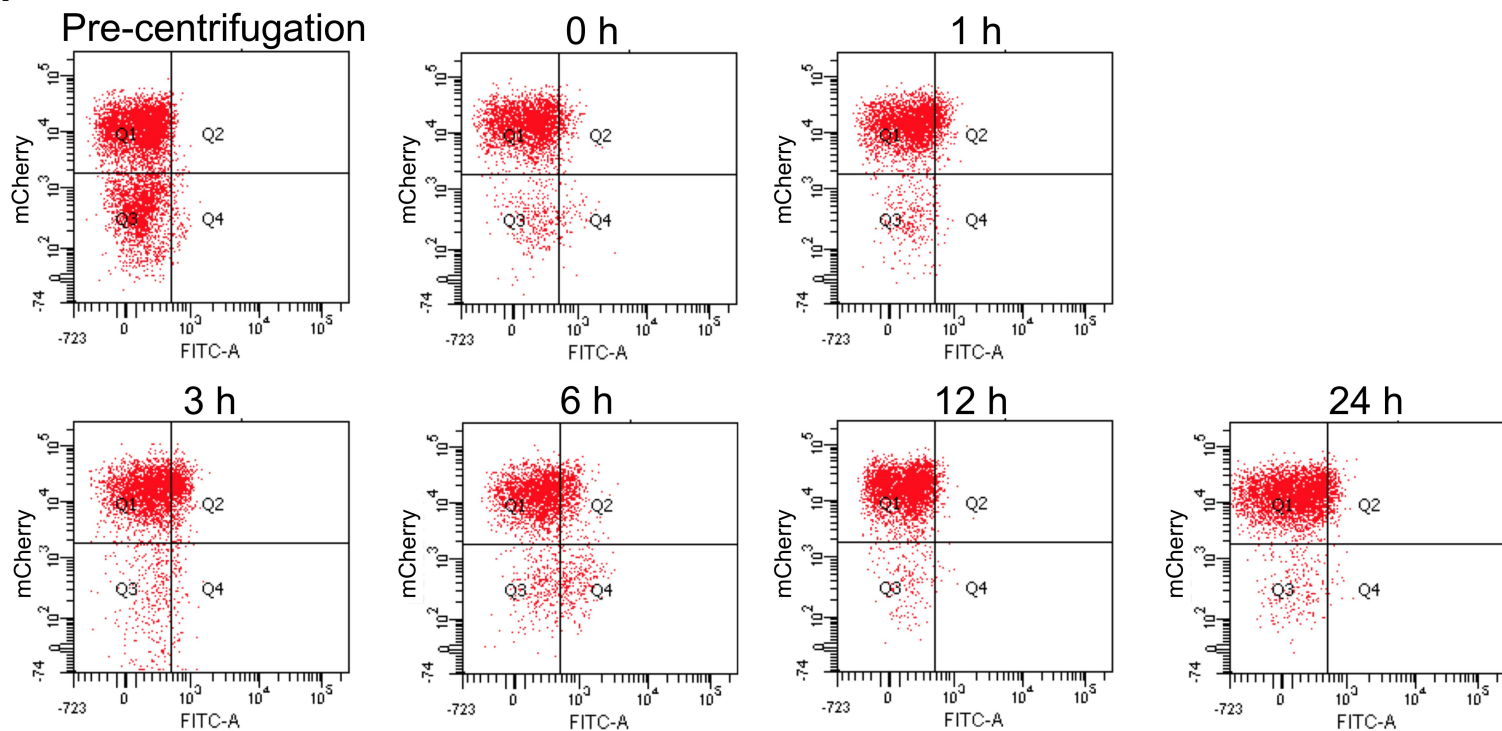**b**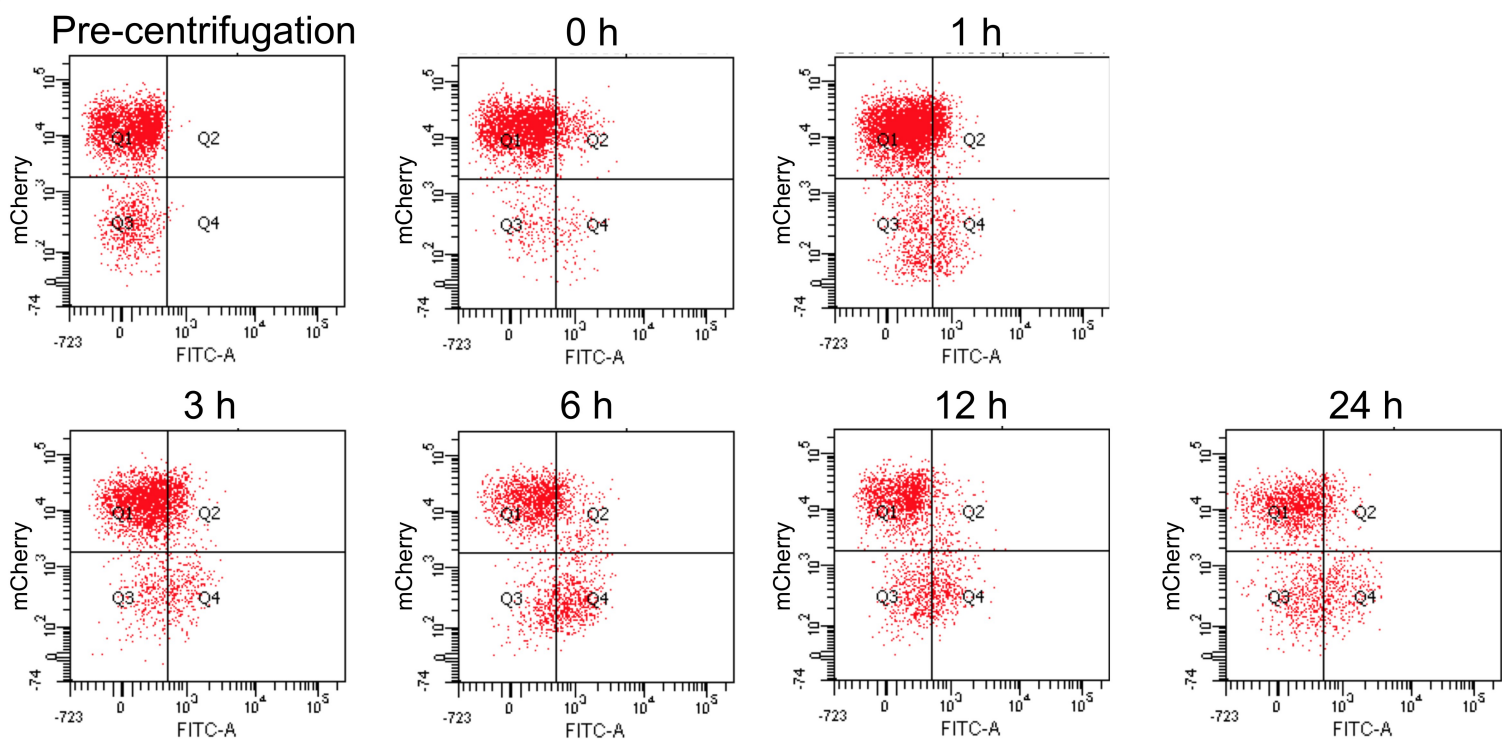

**Supplementary Figure 7. FACS Analysis of PalmGFP<sup>+</sup> EV uptake by Gli36-mCherry GBM cells.** Gli36 cells stably transduced with mCherry were treated with PalmGFP+GlucB<sup>+</sup> EVs (as described in legend to Fig. 6) in the presence (a) or absence (b) of CHX (20  $\mu$ g/ml). Cell samples were analyzed by FACS at different time points from pre-centrifugation (4°C) to 24 h post-centrifugation (37°C).

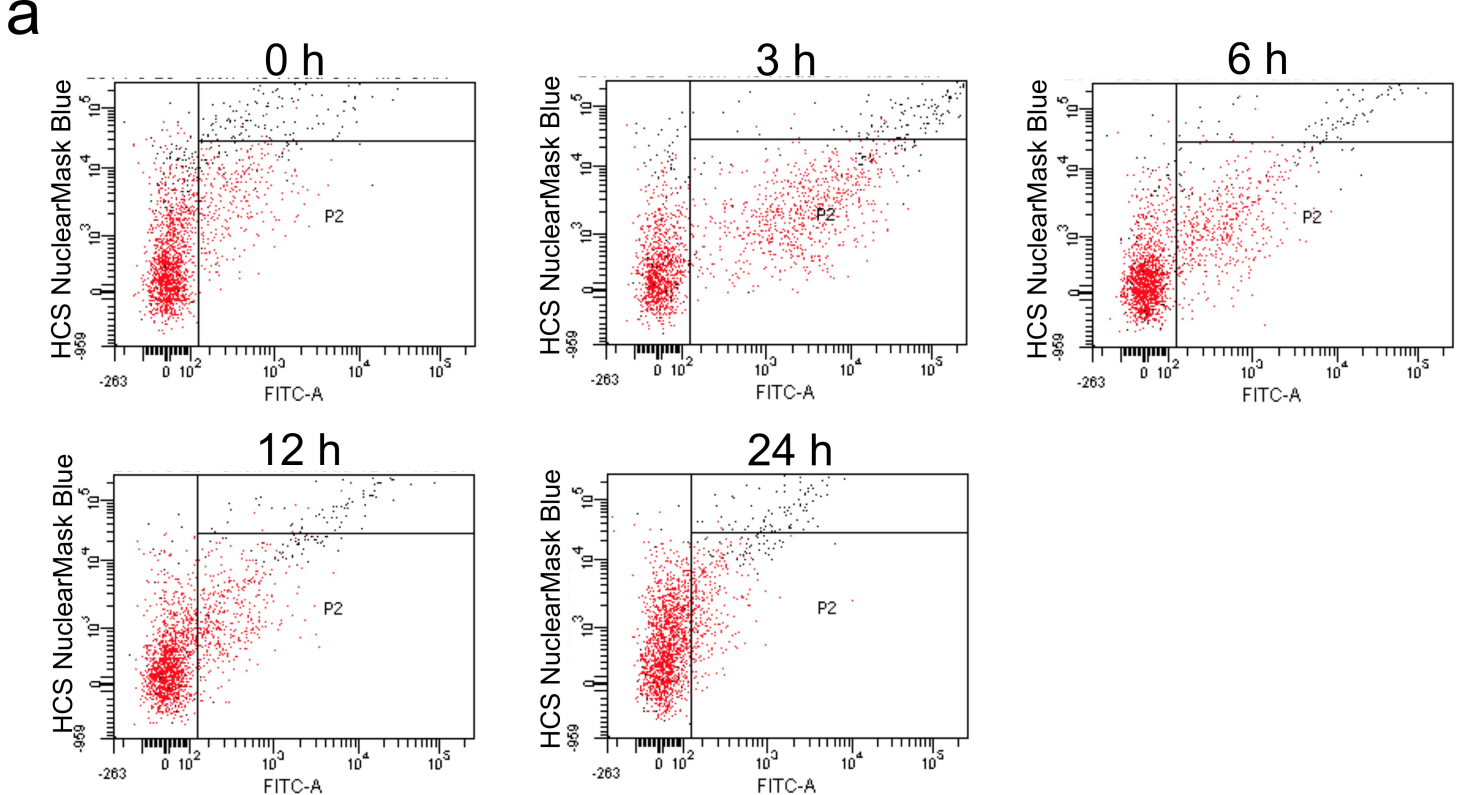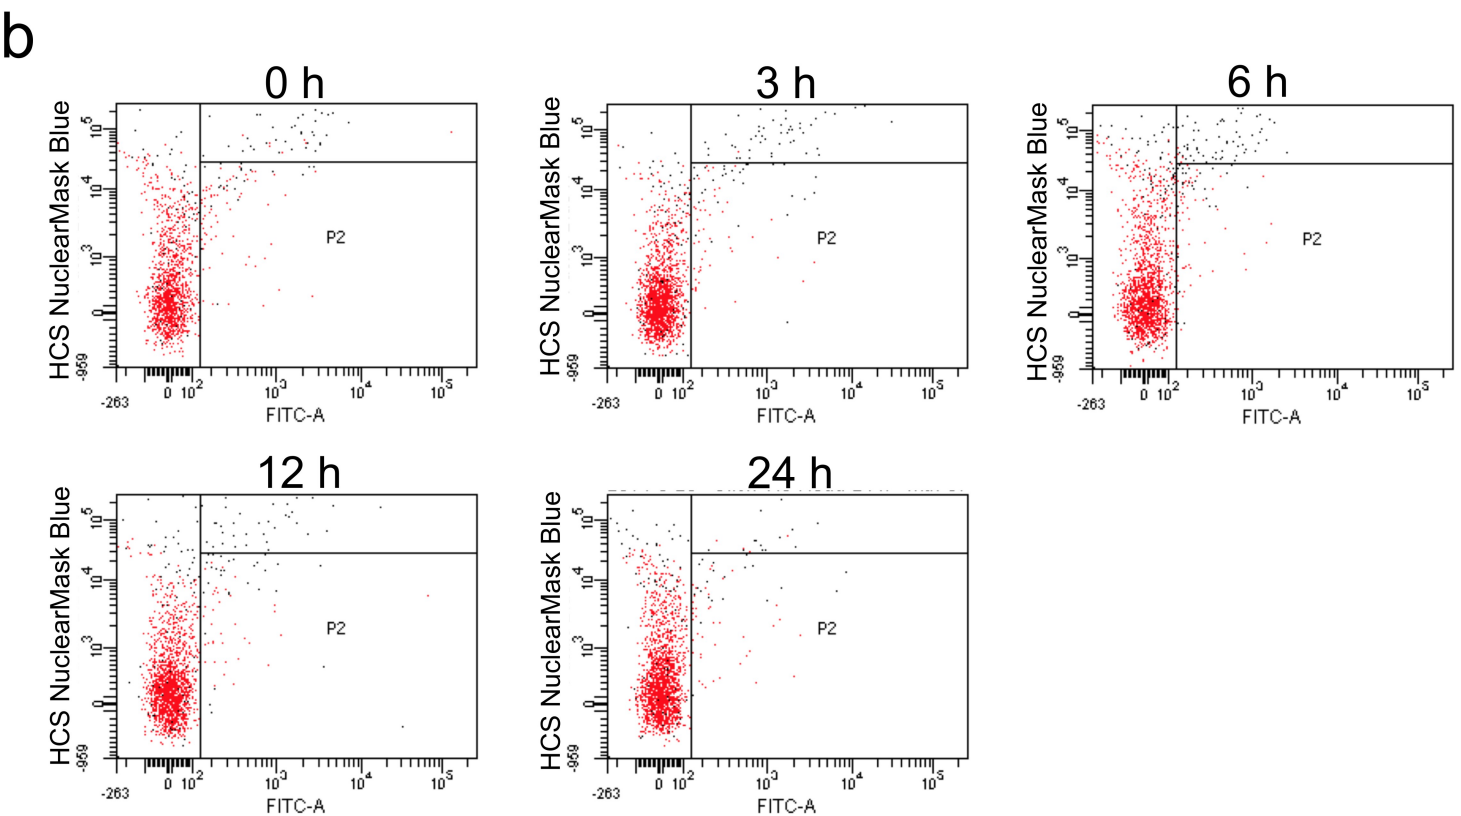

**Supplementary Figure 8. FACS Analysis of nascent protein synthesis.** Gli36 glioma cells stably transduced with mCherry exposed to PalmGFP+GlucB<sup>+</sup> EVs (as described in legend to Fig. 6) were treated with (a) or without (b) CHX (20  $\mu$ g/ml) at 37°C. At each time point, cells were incubated with Click-iT<sup>®</sup> HPG for 30 min, collected for reaction with Alexa Fluor<sup>®</sup> 488 azide, and nascent protein synthesis was measured by FACS analysis.



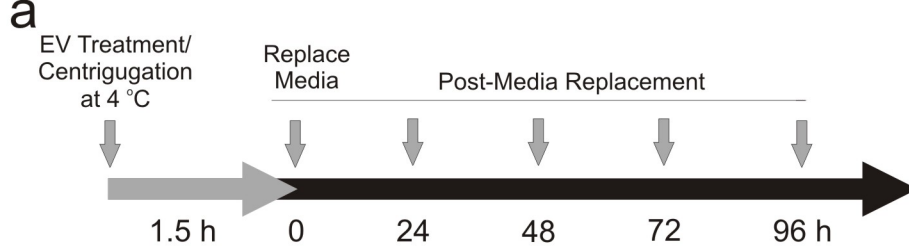

**b**

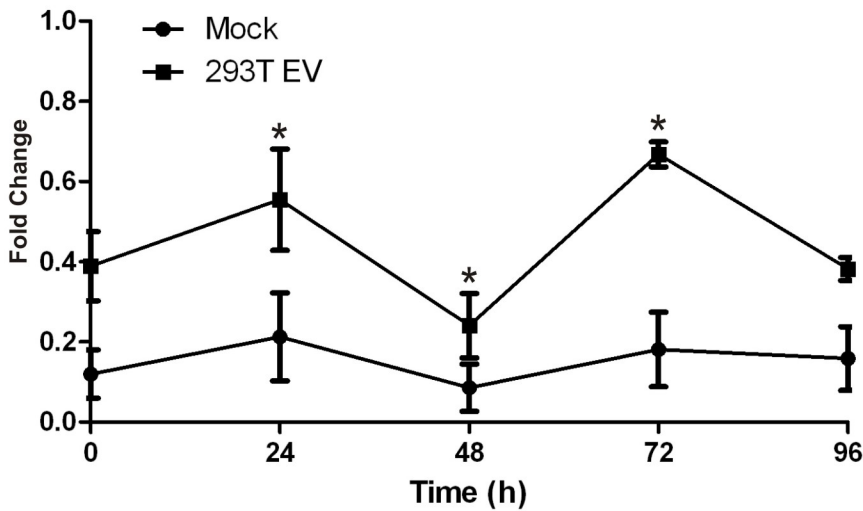

**c**

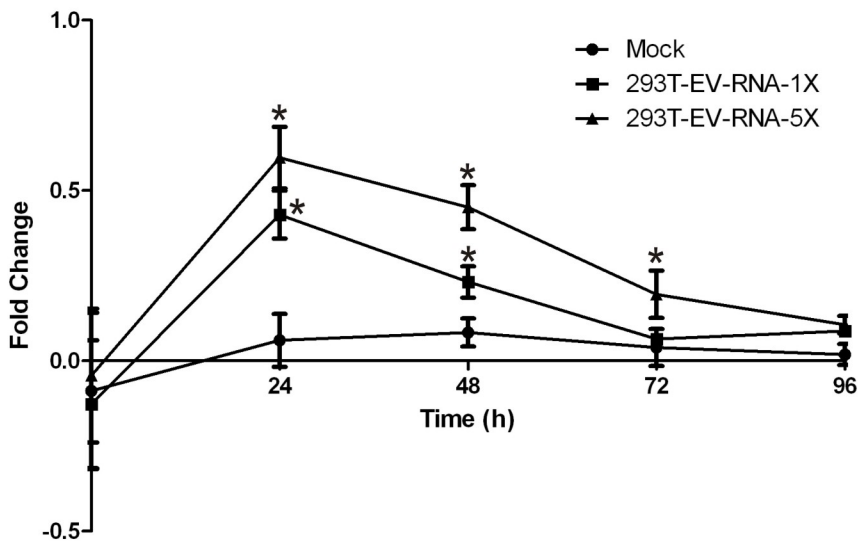

**Supplementary Figure 9. EV and EV-RNA increase NFkB activity in EV recipient cells.** (a) Schematic of EV treatment and sample collection time to assess NFkB-Gluc activity. PBS (control) or EVs isolated from wildtype 293T cells were added to 293T cells stably expressing NFkB-Gluc followed by centrifugation at 4 °C for 1.5 h. The EV-containing media was then removed, washed with PBS and replaced with EV-depleted media. Conditioned media was collected at indicated time points to assess NFkB activity (luciferase activity) of EV-treated cells. (b) NFkB-Gluc assay of EV-treated 293T cells showed a significant increase in NFkB activity starting at 48 h and up to 72 h post-EV treatment. \* $p < 0.05$  by paired t test. (c) Transfection of RNA isolated from 293T-EVs into 293T-NFkB-Gluc cells induced a robust increase in NFkB activity starting at 24 h and up to 72 h post-transfection. 1X represents the amount of RNA (54 ng) isolated from the volume of EVs used to treat 293T-NFkB-Gluc in (b). 5X indicates 5-fold more RNA (270 ng) than the 1X used for the transfection. Mock transfected samples were used as a control for Lipofectamine® 2000 transfection-induced NFkB activity while untransfected cells were used as baseline NFkB-Gluc activity for normalization. \* $p < 0.05$  by one way analysis of variance with Tukey's *post hoc* test when compared to the control (mock).

| Inserts      | Sense/Antisense                                                                                                                                               |
|--------------|---------------------------------------------------------------------------------------------------------------------------------------------------------------|
| PalmGFP      | 5' – ACCGGTCCACCATGCTGTGCTGTA – 3' /<br>5' - AATTCTCGAGGGGCCCTTACTTGTACAGCTCGTC – 3'                                                                          |
| PalmtdTomato | 5'–<br>ACCGGTCCACCATGCTGTGCTGTATGAGAAGAACCAAACAGG<br>TTGAAAAGAATGATGAGGACCAAAGATCATGGTGAGCAAG<br>GGCGAG – 3'/<br>5' – AATTCTCGAGGGGCCCTTACTTGTACAGCTCGTC – 3' |

**Supplementary Table 1. List of Primers**
